# Supplementary material for: Prediction of Pseudoprogression versus Progression using Machine Learning Algorithm in Glioblastoma
Source: PubMed Central journal article supplement (PMC6104063; doi:10.1038/s41598-018-31007-2), 2018-08-21
Supplement: 41598_2018_31007_MOESM1_ESM.pdf [file 41598_2018_31007_MOESM1_ESM.pdf]

## **Supplementary Information**

**Title:** Prediction of Pseudoprogression versus Progression using Machine Learning Algorithm in Glioblastoma

**Authors:** Bum-Sup Jang<sup>1\*</sup>, Seung Hyuck Jeon<sup>1\*</sup>, Il Han Kim<sup>1,3</sup> and In Ah Kim<sup>2,3</sup>

\*These authors contributed equally to this work.

### **Affiliations:**

<sup>1</sup>Department of Radiation Oncology, Seoul National University Hospital, Seoul, Republic of Korea

<sup>2</sup>Department of Radiation Oncology, Seoul National University Bundang Hospital, Seongnamsi, Korea

<sup>3</sup>Institute of Radiation Medicine, Cancer Research Institute, Seoul National University College of Medicine, Seoul, Korea.

**Supplementary Figure S1.** (A) Ten-fold validation of model with scrambled training set, and (B) the resulted ROC curve in the testing set. The result suggests that scrambled inputs plays a negative control since AUC are close to 0.5. Abbreviations: AUC, area under the curve of ROC curve

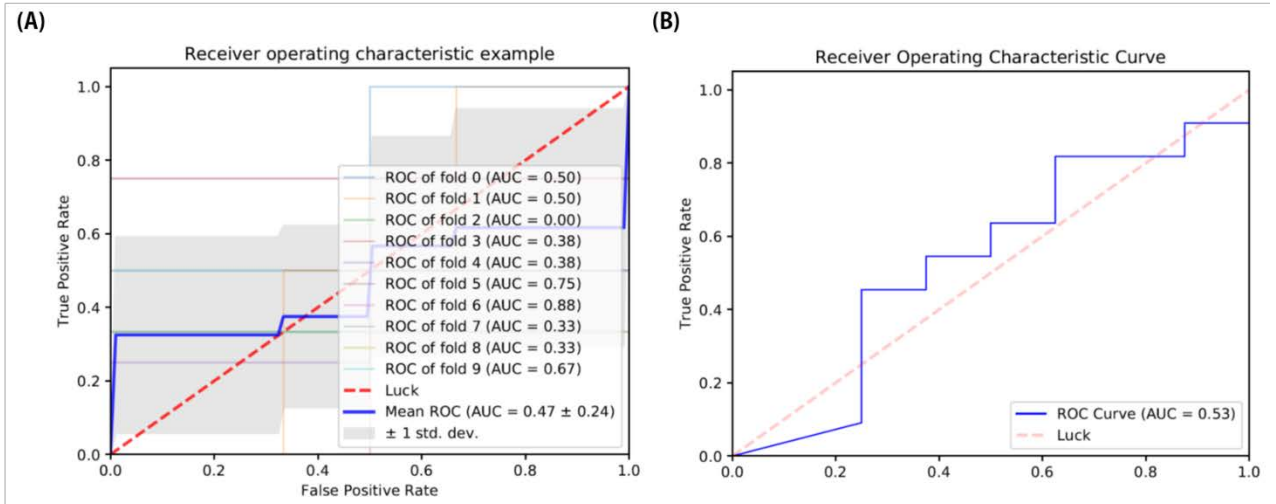

**Supplementary Table S1. Properties of obtained MR images included in the analysis.**

|                        |             | Training set (N=59) | Testing set (N=19)  |
|------------------------|-------------|---------------------|---------------------|
| Magnetic field         | 1.5-T       | 11 (18.6%)          | 0 (0.0%)            |
|                        | 3-T         | 48 (81.4%)          | 19 (100.0%)         |
| Pixel Matrix           | 256 x 256   | 33 (55.9%)          | 0 (0.0%)            |
|                        | 480 x 480   | 6 (10.2%)           | 8 (42.1%)           |
|                        | 512 x 512   | 17 (28.8%)          | 10 (52.6%)          |
|                        | 560 x 560   | 0 (0.0%)            | 1 (5.3%)            |
|                        | 1024 x 1024 | 3 (5.1%)            | 0 (0.0%)            |
| Slice thickness (mm)   |             | 1.0 (0.86-1.5)      | 1.0 (1.0-1.0)       |
| Axial pixel width (mm) |             | 0.45 (0.38-0.50)    | 0.98 (0.23-1.0)     |
| Field of view (mm)     |             | 250 (200-256)       | 226 (193-256)       |
| Repetition time (msec) |             | 1500 (7.968-2100)   | 8.204 (8.103-500)   |
| Echo time (msec)       |             | 1.9 (1.88-4.72)     | 4.605 (4.605-34.15) |
| Flip angle (degree)    |             | 9 (8-20)            | 8 (8-90)            |

Abbreviations: T, tesla, MR, magnetic resonance
